1

2 **FRONT MATTER**

3

4 **Title:**

5 **Large variations in afforestation-related climate cooling and warming effects across short**

6 **distances**

7

8 **Short title:**

9 Variations in afforestation climatic benefits

10

11 **Authors**

12 Shani Rohatyn,<sup>1,2\*</sup> Eyal Rotenberg,<sup>2</sup> Fyodor Tatarinov,<sup>2</sup> Yohay Carmel,<sup>1</sup> and Dan

13 Yakir,<sup>2\*</sup>

14

15 **Affiliations**

16 <sup>1</sup> Faculty of Civil and Environmental Engineering, The Technion – Israel Institute of

17 Technology, Haifa, Israel.

18 <sup>2</sup> Earth and Planetary Sciences, Weizmann Institute of Science, Rehovot, Israel.

19

20 **E-mail:** shani.rohatyn@gmail.com; dan.yakir@weizmann.ac.il

21

22

23 **Abstract**

24 Climate-related benefits of afforestation depend on the balance of the often-contrasting  
25 effects of biogeochemical (carbon sequestration) and biogeophysical (energy balance)  
26 effects. These effects are known to vary at the continental scale (e.g., from boreal to  
27 tropical regions). Here, we show based on a four-year study that the biogeochemical vs.  
28 biogeophysical balance in paired forested and non-forested ecosystems across short  
29 distances and steep aridity gradient (~200Km, aridity index 0.64 to 0.18) can change  
30 dramatically. The required time for the forestation cooling effects via carbon  
31 sequestration, to surpass its warming effects, associated with the forests reduced albedo  
32 and suppressed longwave radiation, decreased from >200 years in the driest sites to ~70  
33 years in the intermediate and ~40 years in the wettest sites. Climate-related benefits of  
34 forestation, previously considered at large-spatial scales, should be considered at high-  
35 spatial resolutions in climate-change mitigation programs aimed at taking advantage of the  
36 vast non-forested dry regions.

37  
38 **Teaser**

39 Climate-related effects of afforestation can vary between cooling and warming effects  
40 across 200 km.  
41  
42

43 **MAIN TEXT**

44

45 **Introduction**

46 Forests have complex interactions with the climate system through biogeochemical and  
47 biogeophysical processes, with implications for the Earth's radiation balance <sup>1-5</sup>. The  
48 growth of forests can have contrasting effects on climate: accumulation of large amounts  
49 of carbon mitigates the current enhancement of the greenhouse effect <sup>6</sup>. In contrast, dark  
50 forest canopies are often characterized by low albedo, thereby increasing radiation  
51 absorption by adding heat to the surface <sup>3,7</sup>. Under humid conditions, the albedo effects  
52 can be compensated for by the latent heat flux (LE), but in water-limited regions, most of  
53 the forest radiation load is dissipated as large sensible-heat flux (H). Variations in these  
54 contrasting effects of the carbon storage and the enhanced radiation absorption under dry  
55 conditions have not been characterized well at high spatial resolution.

56

57 Previous studies have indicated the warming effect of forestation activities in the boreal  
58 area due to snow-albedo feedbacks, where the decrease in albedo is significant during the  
59 long snow-cover periods <sup>8,9</sup>. Recent studies have indicated similar but relatively weaker  
60 trends in temperate regions <sup>10</sup>. Zhang *et al.* <sup>11</sup> showed a local cooling effect in temperate  
61 eastern USA, with a more significant cooling effect of reforestation in warmer sites.

62 Forestation in the tropics is thought to be beneficial to the global climate <sup>12</sup>, mainly  
63 because of the high productivity under high water availability conditions <sup>6</sup>. Across regions  
64 and biomes, from tropical to temperate and from tropical to boreal, a large decrease in the  
65 benefits from forest carbon sequestration potential (the net ecosystem productivity; NEP)  
66 of 30% and 70%, respectively, is generally expected <sup>7</sup>.

67

68 Most previous studies relying on simulations have pointed out changes in radiative forcing  
69 associated with forestation actions across biomes, with limited reference to small-scale  
70 variation<sup>1,13–15</sup>. Such studies indicated that forestation actions, in which croplands or  
71 grasslands were converted to mature forests, reduced the carbon sequestration benefits due  
72 to changes in the surface radiation balance (e.g., reduced albedo). This reduced cooling  
73 effect was largest in the boreal region and decreased through the temperate zone to the  
74 tropical biomes, but the magnitude and direction of such effects can also change when  
75 additional factors are considered. For example, simulated afforestation in the tropics  
76 showed amplification of the biogeochemical cooling effects when variations in sensible  
77 and latent heat fluxes were considered<sup>15</sup>. However, essentially all of these and similar  
78 studies rely on remote-sensing data and the sparsely distributed flux tower in the global  
79 network.

80  
81 Drylands are defined as areas where the aridity index (AI, the ratio of annual precipitation  
82 to potential evapotranspiration) is below 0.65. These regions are commonly further  
83 divided into four aridity index categories<sup>16</sup>: hyper-arid ( $AI \leq 0.05$ ), arid ( $0.05 < AI \leq 0.2$ ),  
84 semi-arid ( $0.2 < AI \leq 0.5$ ), and dry-subhumid ( $0.5 < AI \leq 0.65$ ). Combined, drylands cover  
85 approximately 41% of the earth's surface land area and 17 % of the global drylands are  
86 covered by forests<sup>17–19</sup>. Therefore, investigating processes that can help assess and  
87 evaluate the impact of changes in dryland forest characteristics are clearly important. .

88  
89 Hot drylands are subject to high solar radiation loads and low water availability. These  
90 distinctive conditions, in turn, may be reflected in the distinct climatic impacts of  
91 forestation in these regions. Dryland afforestation was found to have a strong warming  
92 effect due to the shortwave forcing associated with a decrease in albedo<sup>20</sup>. Such effects

93 can be further enhanced due to efficient canopy cooling through sensible heat (“convector  
94 effect”<sup>20,21</sup>), and the resulting suppression of the thermal radiation flux<sup>20</sup>. These effects  
95 ultimately result in an increased radiation load. In contrast, using coupled land-atmosphere  
96 models, Syktus & McAlpine<sup>22</sup> and Yosef *et al.*<sup>23</sup> suggested that large-scale restoration of  
97 savannas woodland ecosystems and forest ecosystems in Australia and the Sahel regions  
98 could lead to a local cooling effect through a chain of biogeophysical processes.

99  
100 Despite water limitations, semi-arid ecosystems are known to play an important role in the  
101 global carbon cycle and climate, particularly in the interannual variability of the terrestrial  
102 carbon sinks<sup>24,25</sup>. Lal<sup>26</sup> suggested that there is a significant carbon sequestration potential  
103 in soil organics of dryland ecosystems (up to 20 Pg C). In a recent study at a semiarid  
104 timberline, Qubaja *et al.*<sup>27</sup> suggested a large potential carbon sink due to afforestation in  
105 the semiarid soils, which was also associated with the extended soil carbon turnover time  
106 (almost 60 years in the top 1 m). The importance of drylands in assessing climate  
107 mitigation potential is further enhanced by the large proportion of the global land surface  
108 they occupy<sup>17</sup> and its restoration potential<sup>28</sup> (see also [www.greatgreenwall.org](http://www.greatgreenwall.org)).

109  
110 This study was motivated by the potential for carbon sequestration in drylands, combined  
111 with the need to account for contrasting biogeophysical effects to obtain a more realistic  
112 assessment of the climatic benefits from forestation actions. We hypothesized that across  
113 the steep climatic gradient, variations in factors such as aridity, soil, and plant  
114 productivity, typical of drylands, could result in considerable changes in the climate  
115 change mitigation potential of forestation at fine scales. This could have important  
116 implications for forestation strategies in these areas.

118

## 119 **Results**

120 We tested our hypothesis using a mobile lab to obtain observationally-based information  
121 on the radiative (long and shortwave radiation) and non-radiative (sensible heat, latent  
122 heat, and carbon) fluxes in paired Aleppo pine forest and non-forest sites across the steep  
123 climatic gradient in Israel (~200km, from arid through semi-arid and dry-subhumid; Fig.  
124 1, Table S1). Correlations between short-term campaigned based radiative and non-  
125 radiative fluxes and continuous meteorological data from nearby meteorological stations  
126 were combined to estimate the long-term radiative and non-radiative fluxes (using  
127 methodology previously developed; Rohatyn *et al.*<sup>29</sup> and see Methods for more  
128 information). The resulted fluxes were then averaged and summed over the period of 10-  
129 15 years and described here.

130 Afforestation (indicated here by the difference between forest and nearby non-forest sites)  
131 had significant effects on all measured components of surface-atmosphere exchange, as  
132 reflected in the observed, annual scale, changes in albedo, sensible heat, latent heat, and  
133 net radiation and carbon fluxes. At all forested sites, the albedo was significantly (P\_value  
134 < 0.005) lower than that of the non-forested sites, which was essentially independent of  
135 the site (~0.13 range across forested sites, which is ~0.1 lower than the adjacent non-  
136 forested sites). At the non-forested sites, albedo increased across the climatic gradient  
137 (from 0.2 to 0.27; Fig. 2A), possibly associated with changes in soil properties (see  
138 Methods section and Table S1). Changes in radiation fluxes were also observed in the  
139 longwave components, with less negative values (i.e., reduced emission) of net longwave  
140 radiation (LWnet) in forested ecosystems, with the greatest effect in the arid sites (~20  
141  $\text{Wm}^{-2}$ ; Fig. 2B). The combined effect of the reduced albedo and reduced longwave

142 emissions contributed to the significant increase in net radiation in the forested sites (up to  
143  $\sim 50 \text{ Wm}^{-2}$ ; Fig. 2D;  $P_{\text{value}} < 0.005$ ).

144  
145 The higher net absorbed radiation in the forested sites was compensated for by higher non-  
146 radiative fluxes. As expected, the latent heat flux was always higher in the forested sites  
147 (50% and 40% higher in the more humid sites;  $P_{\text{value}} < 0.005$ ), but the effect was  
148 minimal (only 20% higher;  $P_{\text{value}} = 0.007$ ) in the arid site where essentially all annual  
149 precipitation is evaporated, independent of land cover (Fig. 2E). Sensible heat flux was  
150 always higher in the forested sites, but particularly in arid sites where it was the major  
151 energy outlet, which almost entirely balanced net radiation ( $>90\%$ ; Fig. 2D, F).

152  
153 All non-forested sites had nearly zero net ecosystem productivity (NEP), which reflected  
154 the large contribution of annual vegetation with large seasonal fluxes of photosynthetic  
155 uptake and respiration, but negligible long-term carbon sequestration. In contrast, all  
156 forested sites had a significant NEP, consistent with the values of forest ages of  
157 approximately 40–50 years. NEP increased along the climatic gradient, with the dry-  
158 subhumid forested site showing almost three times higher NEP compared to that of the  
159 arid site (Fig. 2G).

160  
161 To expand our study beyond the pine forest plantation we added measurements with the  
162 mobile lab in a native Oak-forest ecosystem. The comparison of the Oak-forest site to the  
163 Pine-forested and non-forested sites under the same climate (Fig. 3) indicated a lower  
164 albedo than the non-forested site (50% lower;  $P_{\text{value}} < 0.005$ ), but only slightly higher  
165 value (10% higher;  $P_{\text{value}} < 0.005$ ) than that of the Pine-forest ecosystems (Fig. 3A).  
166 Longwave radiation emission was reduced in the Oak-forest compared with that in the

167 non-forested sites and to a greater extent than that in the Pine-forested site (Fig. 3B).

168 Consistent with the albedo and LW radiation effects, the net radiation was markedly  
169 higher in the Oak-forest than in the non-forested sites, similar to the effect of the Pine  
170 forestation (Fig. 3D;  $P_{\text{value}} < 0.005$ ). As in the pine forestation, latent heat fluxes  
171 increased to a similar extent in the Oak-forest site, compared with the non-forested site.  
172 However, the sensible heat flux was enhanced to a lesser extent in the Oak-forest than in  
173 the Pine-forest (Fig. 3E, F). Finally, while a significant NEP was observed in the Oak-  
174 forest, compared with the non-forested sites, it was nearly a third of the NEP in the Pine-  
175 forested sites (Fig. 3G;  $P_{\text{value}} < 0.005$ ).

176  
177 The differences between forest and non-forest sites ( $\Delta$ ) are summarized in Table 1.

178 Radiative changes (both changes in net shortwave,  $\Delta SW_{\text{net}}$ , and net longwave,  $\Delta LW_{\text{net}}$ ,  
179 radiation) were compared with changes in carbon stocks ( $\Delta NEP$ ). As can be expected due  
180 to their close proximity, the incoming shortwave and longwave radiation for the paired  
181 sites were not significantly different (data not shown), and  $\Delta SW_{\text{net}}$  and  $\Delta LW_{\text{net}}$  reflect  
182 differences in the outgoing radiation. In all paired sites of Pine-forest vs. non-forest  
183 ecosystems, the impact of forestation on shortwave radiation fluxes (increase input) was  
184 larger than the effects on longwave radiation (suppressed output). These differences  
185 between forested and non-forested areas, in both increased input ( $\Delta SW_{\text{net}}$ ) and suppressed  
186 output ( $\Delta LW_{\text{net}}$ ), generally increased with drying across the climatic gradient (Table 1).  
187 However, in the case of the Oak-forest vs its paired non-forested sites, the differences in  
188 shortwave radiation were smaller than the differences in longwave radiation (4% and 8%  
189 of global radiation,  $R_g$ , respectively). Overall,  $\Delta SW_{\text{net}}$  and  $\Delta LW_{\text{net}}$  increased by 50%  
190 and 150%, respectively across the climatic gradient. Conversely, the differences in the



191 annual net change in carbon stocks between forest and non-forest ( $\Delta$ NEP; Table 1)

192 decreased across the climatic gradient by 70%, from dry-subhumid to arid areas.

193  
194 We then used a common method to compare radiation and carbon fluxes by converting the  
195 net change in carbon flux due to forestation action (forest minus non-forest) to the resulted  
196 change in radiative forcing based on the CO<sub>2</sub> radiative efficiency (Myhre *et al.* <sup>30</sup>).

197 Combined, the radiation and carbon components indicated a sharp increase across the  
198 climatic gradient in the ‘Break-even time’, the number of years of carbon accumulation  
199 that produce the radiative forcing required to balance that of the change in albedo and LW  
200 radiation suppression (Table 1). In the dry-subhumid sites, the ‘Break-even time’ was 43  
201 years (31 years based on the shortwave and 12 years based on the longwave components).  
202 In the arid sites, the time to balance was 213 years (132 years for shortwave and 81 for  
203 longwave; note that this >200 years computation result has no special significance beyond  
204 indicating that it is well beyond the relevant time horizon for carbon accumulation in dry  
205 forests). For the Oak-forest, the ‘Break-even time’ was 42 years based on the shortwave  
206 part, which was intermediate between the wetter pine sites. But it was 89 years based on  
207 the longwave component, which was longer than in all pine sites, resulting in a total  
208 ‘Break-even time’ of up to 131 years at this site.

209  
210 Finally, we extrapolated our results from the different forest study sites to a single 80  
211 years forest age basis and used the emission equivalent method of converting radiation  
212 fluxes into carbon equivalent units (see Methods eq. 8+9), to allow comparison of our  
213 small spatial scale (~200 km) climatic gradient study with the results of four large-scale  
214 studies found to be sufficiently suitable for such comparison (Table 2). The results in three  
215 of the four studies indicated a larger net sequestration potential ( $\Delta$ SP) in the temperate and

216 tropical biomes than in the boreal region (approximately 50%–150% increase). Arora &  
217 Montenegro (2011) reported minimal differences in  $\Delta SP$  between boreal and temperate  
218 biomes, but with a much higher  $\Delta SP$  in the tropical biome (~60% higher than temperate  
219 and boreal). Our  $\Delta SP$  measurements, associated with the conversion of the non-forested  
220 sites to Pine-forests, indicated a similar magnitude of change, but across a much smaller  
221 spatial scale. Compared with the arid site,  $\Delta SP$  increased by 85% in the semi-arid site and  
222 by almost 200% in the dry-subhumid site. Note that the non-forested SP for the current  
223 study is near zero at the annual scale (Fig. 2G) and therefore  $\Delta SP$  in such cases provide an  
224 approximation for SP itself in the different sites, indicating a range between 120 and 220  
225  $tC\ ha^{-1}$  for 80 years of the forest growth (Table 2). This translates to 1.5 to 2.8  $tC\ ha^{-1}\ yr^{-1}$ ,  
226 which is consistent within the range obtained by the global FLUXNET network<sup>31</sup>.

227  
228 The results for the estimations of the emission equivalent of shortwave forcing (EESF)  
229 differed in sign and magnitude between the different studies (Table 2). The study by Betts  
230<sup>1</sup> was the only one to report lower EESF in the temperate compared with the boreal biomes  
231 (40% decrease). The study by Mykleby *et al.*<sup>13</sup> found almost no difference between the  
232 two regions, but with 2-3 times higher EESF compared to Betts<sup>1</sup>. The studies of Favero *et*  
233 *al.*<sup>14</sup> and Arora & Montenegro<sup>15</sup> showed similar results for the EESF estimated values,  
234 with approximately 20–25% higher EESF in temperate biomes than in boreal biomes. In  
235 the last two studies, the EESF estimates were different in sign and magnitude, with  
236 positive but rather small EESF in the Favero *et al.*<sup>14</sup> study, and negative EESF indicated  
237 by Arora & Montenegro (2011). In comparison, in the present study, the EESF estimates  
238 were much higher in the arid and semi-arid sites than in the dry-subhumid climatic zones  
239 but, notably, with variations of the same order of magnitude as in the large-scale studies  
240 (Table 2). In our study, we also included the analysis of longwave forcing effects (EELF),

241 which can be significant (e.g., Rotenberg & Yakir<sup>20</sup>), and indicated a similar magnitude of  
242 spatial variability (Table 2).

## 244 **Discussion**

### 246 Forestation effect on the partitioning of radiative and non-radiative fluxes

247  
248 The paired sites approach used here to compare forested vs. adjacent non-forest sites (i.e.,  
249 sites under similar conditions) is useful for evaluating the projected outcomes of  
250 forestation and land-use changes in general<sup>32</sup>. In this study, we also considered the effect  
251 of variations in climate on such projections by studying several paired sites across a sharp  
252 climatic gradient (in precipitation and, hence, in AI), and we focused on the dry  
253 Mediterranean region, which has significant potential for afforestation<sup>28</sup>. Based on this  
254 approach we could obtain quantitative information that is critical in developing forestation  
255 and afforestation strategies for climate change mitigation that are often proposed for the  
256 vast dry-land regions<sup>33–35</sup>.

257  
258 As expected, the results demonstrated how forestation actions consistently decreased  
259 surface albedo, thus contributing to an increase in the net shortwave radiation at the  
260 surface. However, albedo change increased with increasing aridity. These changes across  
261 the climatic gradient resulted mainly from the characteristics of the non-forested sites,  
262 particularly vegetation cover and soil types. Vegetation cover is determined by climate,  
263 and the vegetation cover is of lower stature in the arid non-forested site than in the other  
264 sites. However, it is also greatly affected by grazing, which was, to our knowledge, more  
265 intense in the arid and dry-subhumid sites. The increase in albedo with increasing aridity

266 in the non-forested sites could therefore be influenced by changes in the proportion of  
267 vegetation cover, which in fact increased the effects of changes in the soil type along the  
268 gradient. Soil type, in turn, is related to geographical distribution across the region. The  
269 soil type in the arid site (Rendzic Leptosol, or Haploxeroll) is brighter than the increasing  
270 contribution of the Terra Rossa soil type in the wetter sites <sup>36</sup>. Notably, our result for the  
271 annual mean non-forest albedo in the arid site was 0.27, which is lower than the 0.3–0.35  
272 range measured in the region only in summer by Ben-Gai *et al.* <sup>37</sup>, but consistent with our  
273 summer value of 0.33. This demonstrates the importance of accounting for seasonal  
274 changes and may reflect variations in the combined effects of vegetation and soil. While  
275 the change in albedo varied along the aridity gradient, the albedo for the forested sites was  
276 essentially similar (Fig. 2). This is indicated by the minor changes in leaf properties in the  
277 Aleppo pine trees and little sensitivity to variations in tree density (see Methods section),  
278 partly because tree cover tends to be near-constant, compensating for stand density, and  
279 both measurements and sun angles are mostly off the nadir. It is likely that in contrast to  
280 the non-forested sites, the forest albedo in evergreen forests (but possibly not in deciduous  
281 forests) is essentially decoupled from changes in soil type.

282  
283  
284 The observed increase in net radiation along the gradient values in the forested sites  
285 (composed of the combined albedo and longwave radiation suppression effects) was  
286 compensated for by the increase in the non-radiative fluxes of sensible and latent heat.  
287 This is a natural mechanism for ecosystem energy balance management <sup>32</sup>. However, the  
288 partitioning between the two fluxes differed along the aridity gradient. As expected, latent  
289 heat fluxes were high in the more humid sites, and sensible heat flux was high in the arid  
290 site. These differences are due to differences in available water for the evapotranspiration

291 flux. However, the large sensible heat fluxes in the dry site also require low aerodynamic  
292 resistance, which is associated with the roughness of the more sparse canopy structure  
293 under these conditions (the generation of the “canopy convector effect”;<sup>20,21</sup>)  
294 Interestingly, we have recently shown that convector-type non-evaporative canopy cooling  
295 may originate at the leaf scale<sup>38</sup>. Irrespective of the mechanism, the more efficient canopy  
296 cooling, and the lower forest canopy (skin) temperature, in comparison with the non-  
297 forested land surface, feedback on their radiative fluxes by reducing the outgoing  
298 longwave radiation, compared with the non-forested area. The resulting increase in the net  
299 longwave radiation significantly amplifies the forest surface warming of the albedo  
300 effects. The processes discussed above are driven by moisture limitation and are therefore  
301 particularly pronounced in dry regions, and as shown here, considerably increase along the  
302 aridity gradient (Fig. 2). The low net longwave radiation in both semi-arid sites (Fig. 2B)  
303 and, in turn, the small changes in the longwave component (Table 1), may indicate some  
304 local warming effects, which have not been sufficiently identified at present.

### 305 306 Forest species composition

307  
308 While this study focused on comparing paired sites of maximum similarity and therefore  
309 used mainly Aleppo pine sites, that were common in the study area, an Oak-forest site  
310 nearby offered the opportunity to examine the effects of the dominant tree species. The  
311 nearby Oak-forest and Pine-forest sites had similar aridity but differed largely in  
312 vegetation characteristics and canopy structure. Nevertheless, the two forest types revealed  
313 similar changes in albedo relative to the non-forested sites. However, they markedly  
314 differed in the change in the net longwave radiation between the forest and non-forest sites  
315 (Table 1). Furthermore, while this ecosystem had larger sensible heat flux than the non-

316 forested site, it was much smaller than in the pines, indicating a more limited ‘convector  
317 effect’ of this canopy. The suppressed LW radiation (cooler surface) and limited H, could  
318 be balanced by the relatively large latent heat flux associated with the more extensive  
319 inter-canopy grasses and annuals at this site. This difference can be due to the greater  
320 exposure of the soil surface at this site (smaller canopies). Note that the net ecosystem  
321 productivity (NEP) in the Oak-forest ecosystem was approximately one-third of that in the  
322 Pine-forest ecosystem. The low NEP can be associated with the smaller trees and tree  
323 canopies, which consists mostly of deciduous trees, exposing the grasses, and leading to  
324 high autumn-respiration rates, as was seen at the seasonal scale measurements (data not  
325 shown). Note that in this ecosystem, the balance of the net radiation by the LE + H fluxes  
326 seems to be lower than obtain for the pines (Fig. 3 D-F), but within the acceptable range  
327 (energy closure of approximately 0.9).

### 328 ‘Break-even time’

330  
331 The differences in radiative and non-radiative fluxes described above (Table 2) determine  
332 the biogeophysical effect of forestation action on radiative forcing. Comparing forest and  
333 non-forest paired sites showed in all cases that the forests’ biogeophysical effects produce  
334 “warming” effects, due to both shortwave and longwave forcing. This is generally a one-  
335 time change that can be expected to occur in the early stages of forestation <sup>20,39</sup>. This  
336 warming effect could then be compared with the cumulative biogeochemical “cooling”  
337 effect due to forest carbon sequestration, which reduces the radiative forcing by reducing  
338 atmospheric CO<sub>2</sub> concentrations. NEP increased significantly with decreasing aridity,  
339 except for the Oak-forest ecosystem, which had a much lower NEP, compared with all  
340 pine ecosystems. The high NEP at the dry-subhumid site (460 gC m<sup>-2</sup> yr<sup>-1</sup>) is in agreement

341 with unpublished data for a Greek flux site at Sani, with similar climate conditions, and  
342 within the range reported for Mediterranean warm evergreen forests ( $380 \pm 73 \text{ gC m}^{-2} \text{ yr}^{-1}$ )  
343 <sup>31</sup>. The combination of high NEP and relatively low shortwave and longwave forcing in  
344 the dry-subhumid site resulted in the lowest estimation of the ‘Break-even time’, of 43  
345 years (Table 1), which is already below the current age of this still highly productive  
346 forest.

347  
348 In contrast to the dry-subhumid site, the low NEP and high shortwave and longwave  
349 forcing at the arid site resulted in a very high estimated ‘break-even time’ of 213 years,  
350 which is possibly longer than the forest life cycle. This long ‘break-even time’ is at least  
351 partially due to the low vegetation cover, based on an annual average, in the paired non-  
352 forested site. This, in turn, is the combined result of the dry conditions and intensive  
353 grazing and could enhance desertification processes, as shown for semi-arid lands in Inner  
354 Mongolia <sup>40</sup>. In contrast, some ameliorating effects, such as taking advantage of the  
355 topography and limiting forestation to northern slopes, which could reduce the albedo  
356 effects and enhance productivity <sup>41,42</sup>, also deserve further research. Accordingly, we  
357 suggest that in considering afforestation actions in drylands as a climate mitigation tool,  
358 their actual climatic benefits should be first examined at the local scale. This is the case in  
359 particular, in areas with characteristics (vegetation cover and soil properties), such as in  
360 the current arid study site, where afforestation could result in climatic effects, which are in  
361 contrast to initial expectations.

362  
363 The importance of the dominant tree species in the forestation system was apparent in the  
364 comparison of the Oak-forest and Pine-forest sites to the respective non-forest sites. While  
365 the oaks and pines had relatively similar effects on net radiation, the low NEP in the Oak-

366 forest resulted in a much longer ‘break-even time’ (Fig. 3, Table 1). The Oak-forest  
367 ecosystem is a typical and relatively common ecosystem for the study area <sup>43</sup>, and the  
368 ‘break-even time’ analysis (large biogeophysical and low biogeochemical effects) makes  
369 the climatic benefits of this ecosystem type questionable as the leading motivation for its  
370 expansion. However, the planted Pine-forests (using Aleppo pines, which also have native  
371 history; <sup>44</sup>) showed much higher NEP, and shorter ‘break-even time’. Such more favorable  
372 balance can also be expected for the similarly common but more dense Mediterranean  
373 woodlands, which include oaks as one component <sup>45</sup>. Furthermore, these ecosystems are  
374 important for preserving biodiversity and a range of other ecological services in this region  
375 (e.g., wood production, erosion protection, and leisure activities, among other services; <sup>46</sup>),  
376 irrespective of their contribution to the global climate. Note, however, that the results from  
377 the Oak-forest are based on one site, and future expansion of studies on the climatic  
378 benefits of this locally important ecosystem is strongly encouraged.

379  
380 Our results indicate that differences in conditions (aridity and soil) in regions exposed to  
381 similarly high solar radiation (annual mean of 220–240 W m<sup>-2</sup>), and even within small  
382 geographic distances, may amplify the biogeophysical effects of forestation that have a  
383 warming effect <sup>47</sup>. The results demonstrate that the forest effect on both shortwave and  
384 longwave forcing can be much larger in semi-arid and arid regions than in more humid  
385 regions. It also demonstrates the sensitivity of the climatic effects of forestation actions to  
386 changes over a small spatial scale in the dry-subhumid to arid transition zone. Further,  
387 they indicate that the benefits of afforestation for climate change mitigation diminish with  
388 increasing aridity.



390 It has recently been indicated<sup>19</sup> that under the large-scale drying process expected under  
391 climatic changes in a business-as-usual scenario, 11.2% of the land area will shift to a  
392 drier class of aridity by the end of the century. A cross-analysis of Koutroulis<sup>19</sup> results and  
393 the map of potential restoration opportunities of the Global Restoration Initiative (GRI;  
394<sup>48</sup>), indicated that ~450 Mha of land with a potential of restoration will shift to a drier  
395 aridity class by 2100. Since the ‘break-even time’ increases with aridity, and may exceed  
396 the expected forests life cycles, our results indicate that shifts such as predicted by  
397 Koutroulis<sup>19</sup> may result in corresponding shifts in the potential climate change mitigation  
398 benefits of forestation actions in drylands. This is also applicable to various proposed  
399 natural-based solution activities in the vast dryland regions (~ 40% of the Earth’s land  
400 surface area;<sup>49</sup>), especially those under high radiation load. Importantly, however, forests  
401 support other ecosystem services, apart from the direct mitigation of global warming.  
402 Large-scale dryland afforestation can also modify local and regional precipitation and  
403 surface temperature, such as recently demonstrated for Sahel and Australia<sup>23</sup>. Similarly, in  
404 a regional study in Australia, savanna restoration increased local biophysical cooling<sup>22</sup>.  
405 Finally, it is important to note that focusing on the ‘break-even time’ metrics is not an  
406 alternative to considering the potential for carbon sequestration by forests. Carbon  
407 sequestration is assessed by a variety of metrics, such as stem carbon (e.g. Braakekke *et al.*  
408<sup>50</sup>), timber and biomass, and wood production (e.g. Anderson *et al.*<sup>51</sup>; Favero *et al.*<sup>14</sup>), or  
409 focus on the rate of accumulation using growth curves (e.g. Nilson and Peterson<sup>52</sup>;  
410 Braakekke *et al.*<sup>50</sup>). Here we use SP in tC ha<sup>-1</sup>, which can be interconverted with these  
411 metrics. However, focusing on the ‘break-even time’ analysis as done here, is critical even  
412 before providing an assessment of the penalty associated with factors such as albedo  
413 change, which we show can greatly increase in semi-arid conditions annulling the  
414 sequestration issue altogether.

415

416 Forest climatic benefit - from continental scale to short distances

417 Our results (Table 2) reveal how climatic benefits from forestation actions can vary  
418 significantly across short distances along a climatic gradient (<200 km). Such variations,  
419 and in the same order of magnitude, have been previously reported only across large  
420 distances, typically at continental scales. Furthermore, while biome-scale considerations  
421 are often made, such as in Griscom *et al.*<sup>12</sup>, the potentially large variabilities at finer  
422 scales, such as the inclusion of the importance of species composition, soil and ecosystem  
423 types as shown here are still rarely considered. Therefore, our results demonstrate the  
424 importance of high-resolution studies, especially when considering climate change  
425 mitigation strategies that focus on taking advantage of the forestation potential of the vast  
426 dry land area. We suggest that afforestation of drylands ecosystems where long ‘break-  
427 even time’ is expected (sometimes well beyond the relevant time scale for forest carbon  
428 sequestration), should be avoided as means of climate change mitigation. Nevertheless, the  
429 afforestation of such lands could remain relevant due to other potential ecosystem  
430 services, such as combating desertification, prevention of soil erosion, local wood  
431 production, and social aspects like shading and recreation).

432

433 **Materials and Methods**

434

435 Study site description

436

437 The study was carried out at the edge of an arid region in mature plantations dominated by  
438 *P. halepensis*, of an age of 40-50 years (*Pinus halepensis*), and their adjacent non-forested  
439 ecosystems. The sites were distributed across a climatic gradient from arid and semi-arid

440 to dry sub-humid (Figure 1, Table S1). Three selected paired sites included: (1) An arid  
441 site at Yatir forest (annual precipitation, P: 280 mm; aridity index, AI: 0.18; elevation: 650  
442 m; light brown Rendzina soil, and forest density: 300 trees ha<sup>-1</sup>), where a permanent flux  
443 tower has been operating since the year 2000 (<http://fluxnet.ornl.gov>). Note that an AI of  
444 0.2 marks the boundary between arid and semi-arid regions. Yatir, with AI=0.18, is  
445 formally within an arid zone, but on the edge of a semi-arid zone. (2) An intermediate  
446 semi-arid site in Eshtaol forest (P: 480 mm; AI: 0.37; elevation: 350 m; light brown  
447 Rendzina soil, and forest density: 450 trees ha<sup>-1</sup>). (3) A dry-subhumid site in northern  
448 Israel at the Birya forest (P: 770 mm; AI: 0.64; elevation: 755 m; dark brown Terra-Rossa  
449 and Rendzina soil, and forest density: 600 trees ha<sup>-1</sup>). Non-forest ecosystems were sparse  
450 dwarf shrublands, dominated by *Sarcopoterium spinosum* in a patchy distribution with a  
451 wide variety of herbaceous species, mostly annuals, that grew in between the shrubs  
452 during winter to early spring, and then dried out. All shrubland sites had been subjected to  
453 livestock grazing (exposing soils). Finally, an additional site that was characterized as  
454 Oak-forest vegetation was added. The site was dominated by two oak species, *Quercus*  
455 *calliprinos* and *Quercus ithaburensis* (P: 540 mm; AI: 0.4; for more details on the oak site,  
456 refer to Llusia *et al.* <sup>53</sup>). All sites were under high solar radiation load, with an annual  
457 average of approximately 240 Wm<sup>-2</sup> in the arid region and only 3% lower in the northern  
458 site in the dry-subhumid region (Table 1).

#### 459 Mobile laboratory

460  
461  
462 Measurements were conducted on a campaign basis using a mobile lab with a flux  
463 measurement system at all sites except the Yatir forest, where the permanent flux tower  
464 was used (<http://fluxnet.ornl.gov>; <sup>54</sup>). Repeated campaigns of approximately two weeks at

465 each site, along the seasonal cycle, were undertaken during 4 years of measurements,  
466 2012–2015 (a total of 6-7 campaigns per site, evenly distributed between the seasons) the  
467 4 years of measurements were found to be representative of previous 70 years of  
468 precipitation record (Figure S1). The mobile lab was housed on a 12-ton 4 × 4 truck with a  
469 pneumatic mast with an eddy-covariance system and provided the facility for any auxiliary  
470 and related measurements. Non-radiative flux measurements were undertaken using an  
471 eddy-covariance system to quantify CO<sub>2</sub>, and sensible heat (H), and latent heat (LE) fluxes  
472 using a 3D sonic anemometer (R3, Gill Instruments, Hampshire, UK) and an enclosed-  
473 path CO<sub>2</sub>/H<sub>2</sub>O infrared gas analyzer (IRGA; LI-7200, LI-COR). Non-radiative flux  
474 measurements were accompanied by meteorological sensors, including air temperature  
475 (Ta), relative humidity (RH), and pressure (Campbell Scientific Inc., Logan, UT, USA),  
476 radiation fluxes of net solar- and net long-wave radiation (SWnet and LWnet,  
477 respectively), and photosynthetic radiation sensors (Kipp & Zonen, Delft, Holland). Raw  
478 EC data and the data from the meteorological sensors were collected using a computer and  
479 a CR3000 logger (Campbell Sci., Logan, UT, USA), respectively. The EC system was  
480 positioned at the center of each field site with the location and height aimed at providing  
481 sufficient 'fetch' of relatively homogeneous terrains. For detailed information on the use of  
482 the mobile lab and the following data processing of short and long-term fluxes see Asaf *et*  
483 *al.* and Rohatyn *et al.* previous publications <sup>29,55,56</sup>.

484

#### 485 Data processing

486 Mean 30-min fluxes (CO<sub>2</sub>, LE, and H) were computed using Eddy-pro 5.1.1 software  
487 (LiCor, Lincoln, Nebraska, USA). Quality control of the data included a spike removal  
488 procedure. A linear fit was used for filling short gaps (below three hours) of missing  
489 values due to technical failure. Information about background meteorological parameters,

490 including P, Ta, RH, and global radiation (Rg), was collected from meteorological stations  
491 (standard met stations maintained by the Israel Meteorological Service,  
492 <https://ims.data.gov.il/>). The data were obtained at half-hourly time resolution and for a  
493 continuous period of 15 years since 2000.

#### 494 Estimating continuous fluxes using the flux meteorological algorithm

495 Estimation of the flux-based annual carbon and radiation budgets was undertaken using  
496 the short campaign measurements as a basis to produce a continuous, seasonal, annual,  
497 and inter-annual scale dataset of ecosystem fluxes (flux meteorological algorithm). The  
498 flux meteorological algorithm method was undertaken based on the relationships between  
499 measured fluxes (CO<sub>2</sub>, LE, H, SWnet, and LWnet) and meteorological parameters (Ta,  
500 RH, Rg, VPD, and transpiration deficit, a parameter that correlated well with soil  
501 moisture, see main text and supplementary material of Rohatyn *et al.* <sup>29</sup>. A two-step  
502 multiple stepwise regression was established, first between the measured fluxes (H, LE,  
503 and the ecosystem net carbon exchange) and the meteorological parameters measured by  
504 the mobile lab devices, and then between the two meteorological datasets (i.e., the  
505 variables measured by the Israel meteorological stations) for the same measurement times.  
506 Annual fluxes were calculated for the combined dataset of all campaigns at each site using  
507 the following generic linear equation:  
508

$$509 \quad y = a + \sum_i b_i x_i \quad (1)$$

510  
511  
512 where, y is the ecosystem flux of interest, the daily average for radiative fluxes (LWnet  
513 and SWnet), non-radiative fluxes (H and LE), and daily sum for net ecosystem exchange  
514 (NEE), a and  $b_i$  are parameters, and  $x_i$  is Ta, RH, Rg, vapor pressure deficit, or

515 transpiration deficit. The meteorological variables ( $x_i$ ) were selected by stepwise  
516 regression, with  $b_i = 0$  when a specific  $x_i$  was excluded.  
517  
518 Based on this methodology, ecosystem flux data were extrapolated to the previous 7–15  
519 years (since 2000 in the dry-subhumid and arid sites, since 2004 in the semi-arid sites, and  
520 since 2008 in the Oak-forest site) using all the available continuous meteorological  
521 parameters from the meteorological stations associated with our field sites. The long-term  
522 annual sums and means of extrapolated ecosystem fluxes were averaged for multi-year  
523 means of each site for the period of available extrapolated data. To test the extrapolation  
524 method, we conducted simulation experiments at the arid forest site, where continuous  
525 flux data from the 20 years old permanent flux tower were available. Five percent of the  
526 daily data were selected by bootstrap, a stepwise regression was performed for this sample,  
527 and then, the prediction of fluxes using the eq. 1 above was performed for the entire  
528 observation period ( $R^2$  of about 60% for the NEE flux; see Rohatyn *et al.*<sup>29</sup> for more  
529 details).  
530 The aridity index of the Oak-forest was in between those of the semi-arid and dry-  
531 subhumid Pine-forests (0.4 compared to 0.37 and 0.67, respectively). Therefore, to  
532 compare the Oak-forest with Pine-forest and non-forest sites, the average results from the  
533 semi-arid and dry-subhumid paired sites were used.

534

### 535 Radiative Forcing and Carbon Equivalence Equations

536 To compare the changes in the carbon and radiation budgets caused by forestation, we  
537 adopted the approach of Myhere *et al.*<sup>30</sup>, and used Eq. 2:

538

$$539 \quad RF_{\Delta C} = 5.35 \ln \left( 1 + \frac{\Delta C}{C_0} \right) \quad , \quad [W \ m^{-2}] \quad (2)$$

540

541

542

543

544

545

546

547

548

549

550

551

552

553

554

555

556

557

558

559

560

561

562

563

564

where land-use changes in radiative forcing ( $RF_{\Delta C}$ ) are calculated based on the  $CO_2$  reference concentration,  $C_0$  (400 ppm for the measured period of study), and  $\Delta C$ , which is the change in atmospheric  $CO_2$  in ppm, with a constant radiative efficiency (RE) value of 5.35. Here,  $\Delta C$  is calculated based on the annual net ecosystem productivity (NEP; positive carbon gain by the forest, which is identical to net ecosystem exchange (NEE), the negative carbon removal from the atmosphere) as the difference between forested and non-forested ecosystems ( $\Delta NEP$ ) multiplied by a unit conversion constant:

$$\Delta C = [\overline{NEP}_F - \overline{NEP}_{NF}]_{[g\ C\ m^{-2}\ y^{-1}]} \cdot k \quad [ppm] \quad (3)$$

where,  $k$  is a unit conversion factor, from ppm to g C ( $k = 2.13 \times 10^9$ ), calculated as the ratio between the air molar mass ( $M_a = 28.95$ ; g mol<sup>-1</sup>), to carbon molar mass ( $M_c = 12.0107$ ; g mol<sup>-1</sup>), and total air mass ( $m_a = 5.15 \times 10^9$ ; g).

Etminan *et al.*<sup>57</sup> introduced an updated approach to calculate the RE as a co-dependent of the change in  $CO_2$  concentration and atmospheric  $N_2O$ :

$$RE = a_1(\Delta C)^2 + b_1|\Delta C| + c_1\bar{N} + 5.36 \quad , \quad [W\ m^{-2}] \quad (4)$$

where,  $\Delta C$  is the change in atmospheric  $CO_2$  in ppm resulting from the forestation, as calculated in Eq. 3,  $\bar{N}$  is the atmospheric  $N_2O$  concentration in ppb (323), and the coefficients  $a_1$ ,  $b_1$ , and  $c_1$  are  $-2.4 \times 10^{-7}$  Wm<sup>-2</sup>ppm<sup>-1</sup>,  $7.2 \times 10^{-4}$  Wm<sup>-2</sup>ppm<sup>-1</sup>, and  $-2.1 \times 10^{-4}$  Wm<sup>-2</sup>ppb<sup>-1</sup>, respectively.

Combining Eqs. 2 and 4 with an airborne fraction of  $\zeta = 0.44$ <sup>58</sup>, we obtain Eq. 5:

$$RF_{\Delta C} = \zeta \cdot RE \cdot \ln\left(1 + \frac{\Delta C}{C_0}\right) \quad , \quad [W \ m^{-2}] \quad (5)$$

Next, the annual average radiative forcing due to differences in radiation flux was calculated as follows:

$$RF_{\Delta R} = \frac{\Delta R \cdot A_F}{A_E} \quad , \quad [W \ m^{-2}] \quad (6)$$

where,  $\Delta R$  is the difference between forest and non-forest reflected short-wave or emitted long-wave radiation ( $\Delta SW_{net}$  and  $\Delta LW_{net}$ , respectively), assuming that the atmospheric incoming solar and thermal radiation fluxes are identical for the two, normalized by the ratio of the forest area ( $A_F$ ) to the Earth area ( $A_E = 5.1 \times 10^{14} \ m^2$ ).

As forest conversion mostly has a lower albedo, the number of years needed to balance ('Break even time') the warming effect of changes in radiation budget by the cooling effect of carbon sequestration is calculated by combining Eqs. 5 and 6:

$$'Break \ even \ time' = \frac{RF_{\Delta \alpha}}{RF_{\Delta C}} \quad , \quad [years] \quad (7)$$

The multiyear averages of NEP for each of the three paired sites (forest and non-forest) were then modeled over a forest life span of 80 years. This was done based on a logarithmic model, modified for dryland, which takes as an input the long-term averages of NEP ( $\overline{NEP}$ ):



589

590

$$NEP_t = \overline{NEP}(1 - \exp^{b \cdot t}), \quad [gC \ m^{-2}yr^{-1}] \quad (8)$$

591

592

593

594

595

596

597

598

599

600

601

602

603

604

605

$$\Delta SP = \sum_{t=0}^{age} \Delta NEP_t / 100, \quad [tC \ ha^{-1}age^{-1}] \quad (9)$$

606

607

608

609

610

611

612

613

$$EESF = C_0 \left( e^{\frac{RF_{\Delta R}}{\zeta RE}} - 1 \right) \cdot k / 100, \quad [tC \ ha^{-1}age^{-1}] \quad (10)$$

614

615 where,  $C_0$  is the reference atmospheric CO<sub>2</sub> concentration (400 ppm, the average  
616 atmospheric concentration for the past decade),  $RF_{\Delta R}$  is the multiyear average change in  
617 radiative forcing as a result of the change in surface albedo (Eq. 6  $W m^{-2}$ ),  $RE$  is the  
618 radiative efficiency (Eq. 4,  $W m^{-2}$ ),  $\zeta$  is the airborne fraction (0.44 as in Eq. 5), and  $k$  is a  
619 conversion factor, from ppm to g C ( $2.13 \times 10^9$  as in Eq. 3). Eq. 10 was also used to  
620 calculate the emission equivalent of longwave forcing (EELF) with the  $RF_{\Delta R}$  as the  
621 multiyear average change in radiative forcing as a result of the change in net long-wave  
622 radiation ( $\Delta LWnet$ ).

623

624 Finally, the net equivalent change in carbon stock due to both the cooling effect of carbon  
625 sequestration and the warming effect due to albedo change (net equivalent stock change;  
626 NES), was calculated by a simple subtraction:

627

$$628 \quad NES = \Delta SP - EESF, \quad [tC \text{ ha}^{-1} \text{ age}^{-1}] \quad (11)$$

629

630 A comparison of the  $\Delta SP$  (Eq. 9), the EESF (Eq. 10), and NES (Eq. 11) with the same  
631 metrics as those used in other studies<sup>1,14,61</sup> was done when appropriate. An exception was  
632 made for Arora & Montenegro (2011), where only carbon stock changes ( $\Delta SP$ ) were  
633 available in carbon units, and biogeophysical (BGP) and biogeochemical (BGC) effects  
634 were expressed as temperature changes. To overcome this metric difference, we converted  
635 the biogeophysical to carbon equivalent units (EESF+EELF) by multiplying the carbon  
636 stock changes ( $\Delta SP$ ) by the ratio between the BGP and BGC effects on temperature (EESF  
637 + EELF =  $\Delta SP \times BGP/BGC$ ).

638

639 Statistical and data analyses

640 The paired t-test was used to compare multi-annual averages of all variables between  
641 forested and adjacent non-forested sites and between sites across the climatic gradient. The  
642 variables of interest that were detected for their significant differences were albedo, net  
643 radiation and its longwave and shortwave components, latent heat fluxes, sensible heat  
644 fluxes, and net ecosystem productivity. All statistical and data analyses were performed  
645 using R 3.6.0 (R Core Team, 2020).

646 **References**

- 647 1. Betts, R. A. Offset of the potential carbon sink from boreal forestation by decreases in  
648 surface albedo. *Nature* **408**, 187–190 (2000).
- 649 2. Bala, G. *et al.* Combined climate and carbon-cycle effects of large-scale deforestation.  
650 *Proc. Natl. Acad. Sci.* **104**, 6550–6555 (2007).
- 651 3. Anderson, R. G. *et al.* Biophysical considerations in forestry for climate protection. *Front.*  
652 *Ecol. Environ.* **9**, 174–182 (2011).
- 653 4. Zhao, K. & Jackson, R. B. Biophysical forcings of land-use changes from potential forestry  
654 activities in North America. *Ecol. Monogr.* **84**, 329–353 (2014).
- 655 5. Bright, R. M., Zhao, K., Jackson, R. B. & Cherubini, F. Quantifying surface albedo and  
656 other direct biogeophysical climate forcings of forestry activities. *Glob. Chang. Biol.* **21**,  
657 3246–3266 (2015).
- 658 6. Pan, Y. *et al.* A Large and Persistent Carbon Sink in the World’s Forests. *Science* **333**,  
659 (2011).
- 660 7. Bonan, G. B. Forests and climate change: forcings, feedbacks, and the climate benefits of  
661 forests. *Science* **320**, 1444–1449 (2008).
- 662 8. Myhre, G. *et al.* Anthropogenic and natural radiative forcing. in *Climate Change 2013 the*  
663 *Physical Science Basis: Working Group I Contribution to the Fifth Assessment Report of*  
664 *the Intergovernmental Panel on Climate Change* (eds. Stocker, T. F. *et al.*) **9781107057**,  
665 659–740 (Cambridge University Press, Cambridge, United Kingdom and New York, NY,  
666 USA., 2013).
- 667 9. Canadell, J. G. & Raupach, M. R. Managing forests for climate change mitigation. *Science*  
668 **320**, 1456–1457 (2008).
- 669 10. Novick, K. A. & Katul, G. G. The Duality of Reforestation Impacts on Surface and Air  
670 Temperature. *J. Geophys. Res. Biogeosciences* **125**, 1–15 (2020).

- 671 11. Zhang, Q. *et al.* Reforestation and surface cooling in temperate zones: Mechanisms and  
672 implications. *Glob. Chang. Biol.* **26**, 3384–3401 (2020).
- 673 12. Griscom, B. W. *et al.* Natural climate solutions. *Proc. Natl. Acad. Sci. U. S. A.* **114**, 11645–  
674 11650 (2017).
- 675 13. Mykleby, P., Snyder, P. & Twine, T. Quantifying the tradeoff between carbon  
676 sequestration and albedo in mid and high latitude North American forests. *Geophys. Res.*  
677 *Lett.* 2493–2501 (2017). doi:10.1002/2016GL071459
- 678 14. Favero, A., Sohngen, B., Huang, Y. & Jin, Y. Global cost estimates of forest climate  
679 mitigation with albedo: A new integrative policy approach. *Environ. Res. Lett.* **13**, (2018).
- 680 15. Arora, V. K. & Montenegro, A. Small temperature benefits provided by realistic  
681 afforestation efforts. *Nat. Geosci.* **4**, 514–518 (2011).
- 682 16. Sorensen, L. *A Spatial Analysis Approach to the Global Delineation of Dryland Areas of*  
683 *Relevance to the CBD Programme of Work on Dry and Sub-Humid Lands.* (2007).
- 684 17. Bastin, J. *et al.* The extent of forest in dryland biomes. *Science* **356**, 635–638 (2017).
- 685 18. Huang, J., Yu, H., Guan, X., Wang, G. & Guo, R. Accelerated dryland expansion under  
686 climate change. *Nat. Clim. Chang.* **6**, (2015).
- 687 19. Koutroulis, A. G. Dryland changes under different levels of global warming. *Sci. Total*  
688 *Environ.* **655**, 482–511 (2019).
- 689 20. Rotenberg, E. & Yakir, D. Contribution of semi-arid forests to the climate system. *Science*  
690 **327**, 451–454 (2010).
- 691 21. Banerjee, T., De Roo, F. & Mauder, M. Explaining the convective effect in canopy  
692 turbulence by means of large-eddy simulation. *Hydrol. Earth Syst. Sci.* **21**, 2987–3000  
693 (2017).
- 694 22. Syktus, J. I. & McAlpine, C. A. More than carbon sequestration: Biophysical climate  
695 benefits of restored savanna woodlands. *Sci. Rep.* **6**, 29194 (2016).

- 696 23. Yosef, G. *et al.* Large-scale semi-arid afforestation can enhance precipitation and carbon  
697 sequestration potential. *Sci. Rep.* **8**, 996 (2018).
- 698 24. Ahlström, A. *et al.* The dominant role of semi-arid ecosystems in the trend and variability  
699 of the land CO<sub>2</sub> sink. *Science* **348**, 895–899 (2015).
- 700 25. Poulter, B. *et al.* Contribution of semi-arid ecosystems to interannual variability of the  
701 global carbon cycle. *Nature* **509**, 600–603 (2014).
- 702 26. Lal, R. Carbon sequestration in dryland ecosystems. *Environ. Manage.* **33**, 528–544  
703 (2004).
- 704 27. Qubaja, R., Grünzweig, J. M., Rotenberg, E. & Yakir, D. Evidence for large carbon sink  
705 and long residence time in semiarid forests based on 15 year flux and inventory records.  
706 *Glob. Chang. Biol.* 1–12 (2019). doi:10.1111/gcb.14927
- 707 28. Bastin, J.-F. *et al.* The global tree restoration potential. *Science* **365**, 76–79 (2019).
- 708 29. Rohatyn, S. *et al.* Differential Impacts of Land Use and Precipitation on “Ecosystem Water  
709 Yield”. *Water Resour. Res.* **54**, 5457–5470 (2018).
- 710 30. Myhre, G., Highwood, E. J., Shine, K. P. & Stordal, F. New estimates of radiative forcing  
711 due to well mixed greenhouse gases. *Geophys. Res. Lett.* **25**, 2715–2718 (1998).
- 712 31. Luysaert, S. *et al.* CO<sub>2</sub> balance of boreal, temperate, and tropical forests derived from a  
713 global database. *Glob. Chang. Biol.* **13**, 2509–2537 (2007).
- 714 32. Lee, X. *et al.* Observed increase in local cooling effect of deforestation at higher latitudes.  
715 *Nature* **479**, 384–387 (2011).
- 716 33. Laestadius, L., Buckingham, K., Maginnis, S. & Saint-Laurent, C. Before Bonn and  
717 beyond: A history of forest landscape restoration and an outlook for the future. *Unasylva*  
718 **66**, 11–18 (2015).
- 719 34. Fagan, M. E. A lesson unlearned? Underestimating tree cover in dryland biases global  
720 restoration maps. *Glob. Chang. Biol.* 4679–4690 (2020). doi:10.1111/gcb.15187

- 721 35. Cernansky, R. How to plant a trillion trees. *Nature* **560**, 542–544 (2018).
- 722 36. Singer, A. *The soils of Israel*. (Springer Science & Business, 2007).
- 723 37. Ben-Gai, T., Bitan, A., Manes, A., Alpert, P. & Israeli, A. Aircraft measurements of  
724 surface Albedo in relation to climatic changes in southern Israel. *Theor. Appl. Climatol.* **61**,  
725 207–215 (1998).
- 726 38. Muller, J. D. *et al.* Dual reference method for high precision infrared measurement of leaf  
727 surface temperature under field conditions. *bioRxiv* 2021.04.25.440729 (2021).
- 728 39. Wohlfahrt, G., Tomelleri, E. & Hammerle, A. The albedo–climate penalty of hydropower  
729 reservoirs. *Nat. Energy* (2021). doi:10.1038/s41560-021-00784-y
- 730 40. Li, G. S. *et al.* Grassland desertification by grazing and the resulting micrometeorological  
731 changes in Inner Mongolia. *Agric. For. Meteorol.* **102**, 125–137 (2000).
- 732 41. Osem, Y. *et al.* The potential of transforming simple structured pine plantations into mixed  
733 Mediterranean forests through natural regeneration along a rainfall gradient. *For. Ecol.*  
734 *Manage.* **259**, 14–23 (2009).
- 735 42. Carmel, Y. & Kadmon, R. Effects of grazing and topography on long-term vegetation  
736 changes in a Mediterranean ecosystem in Israel. *Plant Ecol.* **145**, 243–245 (1999).
- 737 43. Schiller, G., Ungar, E. D., Cohen, S. & Herr, N. Water use by Tabor and Kermes oaks  
738 growing in their respective habitats in the Lower Galilee region of Israel. *For. Ecol.*  
739 *Manage.* **259**, 1018–1024 (2010).
- 740 44. Ne’eman, G. & Osem, Y. *Pines and Their Mixed Forest Ecosystems in the Mediterranean*  
741 *Basin*. (Springer, 2021).
- 742 45. Luysaert, S. *et al.* The European carbon balance. Part 3: Forests. *Glob. Chang. Biol.* **16**,  
743 1429–1450 (2010).
- 744 46. Birch, J. C. *et al.* Cost-effectiveness of dryland forest restoration evaluated by spatial  
745 analysis of ecosystem services. *Proc. Natl. Acad. Sci. U. S. A.* **107**, 21925–21930 (2010).

- 746 47. Calabrò, E. & Magazù, S. Correlation between increases of the annual global solar  
747 radiation and the ground albedo solar radiation due to desertification-A possible factor  
748 contributing to climatic change. *Climate* **4**, (2016).
- 749 48. Potapov, P., Laestadius, L. & Minnemeyer, S. Global map of forest cover and condition.  
750 (2011).
- 751 49. Safriel, U. *et al.* Dryland Systems. in *Ecosystems and Human Well-Being: Current State*  
752 *and Trends: Findings of the Condition and Trends Working Group* (Island Press, 2005).
- 753 50. Braakhekke, M. C. *et al.* Modeling forest plantations for carbon uptake with the LPJmL  
754 dynamic global vegetation model. *Earth Syst. Dyn.* **10**, 617–630 (2019).
- 755 51. Griffith, D. M. *et al.* Comment on “The extent of forest in dryland biomes”. *Science* **358**,  
756 635–638 (2017).
- 757 52. Nilson, T. & Peterson, U. Age dependence of forest reflectance: Analysis of main driving  
758 factors. *Remote Sens. Environ.* **48**, 319–331 (1994).
- 759 53. Llusia, J. *et al.* Photosynthesis, stomatal conductance and terpene emission response to  
760 water availability in dry and mesic Mediterranean forests. *Trees - Struct. Funct.* **30**, 749–  
761 759 (2016).
- 762 54. Baldocchi, D. *et al.* FLUXNET: A new tool to study the temporal and spatial variability of  
763 ecosystem-scale carbon dioxide, water vapor, and energy flux densities. *Bull. Am.*  
764 *Meteorol. Soc.* **82**, 2415–2434 (2001).
- 765 55. Asaf, D. *et al.* Ecosystem photosynthesis inferred from measurements of carbonyl sulphide  
766 flux. *Nat. Geosci.* **6**, 186–190 (2013).
- 767 56. Seco, R. *et al.* Springtime ecosystem-scale monoterpene fluxes from Mediterranean pine  
768 forests across a precipitation gradient. *Agric. For. Meteorol.* **238**, 150–159 (2017).
- 769 57. Etminan, M., Myhre, G., Highwood, E. J. & Shine, K. P. Radiative forcing of carbon  
770 dioxide, methane, and nitrous oxide: A significant revision of the methane radiative



- 771 forcing. *Geophys. Res. Lett.* **43**, 12,614–12,623 (2016).
- 772 58. Friedlingstein, P. *et al.* Global carbon budget 2019. *Earth Syst. Sci. Data* **11**, 1783–1838  
773 (2019).
- 774 59. Besnard, S., Carvalhais, N. & Bruin, S. De. Quantifying the effect of forest age in annual  
775 net forest carbon balance. *Environ. Res. Lett.* (2018). doi:10.1088/1748-9326/aaeae9
- 776 60. Rohatyn, S., Rotenberg, E., Yakir, D. & Carmel, Y. Assessing climatic benefits from  
777 forestation potential in semi-arid lands. *Environ. Res. Lett* (2021). doi:10.1088/1748-  
778 9326/ac29e9
- 779 61. Mykleby, P. M., Snyder, P. K. & Twine, T. E. Quantifying the trade-off between carbon  
780 sequestration and albedo in midlatitude and high-latitude North American forests.  
781 *Geophys. Res. Lett.* **44**, 2493–2501 (2017).
- 782 62. R Core Team. *R: A Language and Environment for Statistical Computing*. (R Foundation  
783 for Statistical Computing, 2020).
- 784

## 785 **Acknowledgments**

786 S.R., E.R, F.T., Y.C., and D.Y. jointly planned and designed the methods and results of  
787 the research. S.R. and E.R. conducted the fieldwork. S.R. and F.T. analyzed the data. S.R.  
788 wrote the original draft, and the final version was produced jointly by all coauthors.

789 We thank R. Stern and J. Muller for providing insights on developing these study  
790 methods. We thank E. Ramati for assisting with conducting the measurements by the  
791 mobile lab, and E. Schwartz for processing the long-term flux-tower and meteorological  
792 data. This project was supported by: ISF grants no. 2579/16, ISF grants no. 1976/17, And  
793 the JNF-KKL. Data is deposited in the European Fluxnet Database ([http://europe-  
794 fluxdata.eu](http://europe-fluxdata.eu)). Meteorological data are available from the Israeli Meteorological Service

795           IMS (<https://ims.data.gov.il/>). Additional data is deposited in the lab archive and available  
796           from the corresponding authors.

797

798 **Figures and Tables**

799

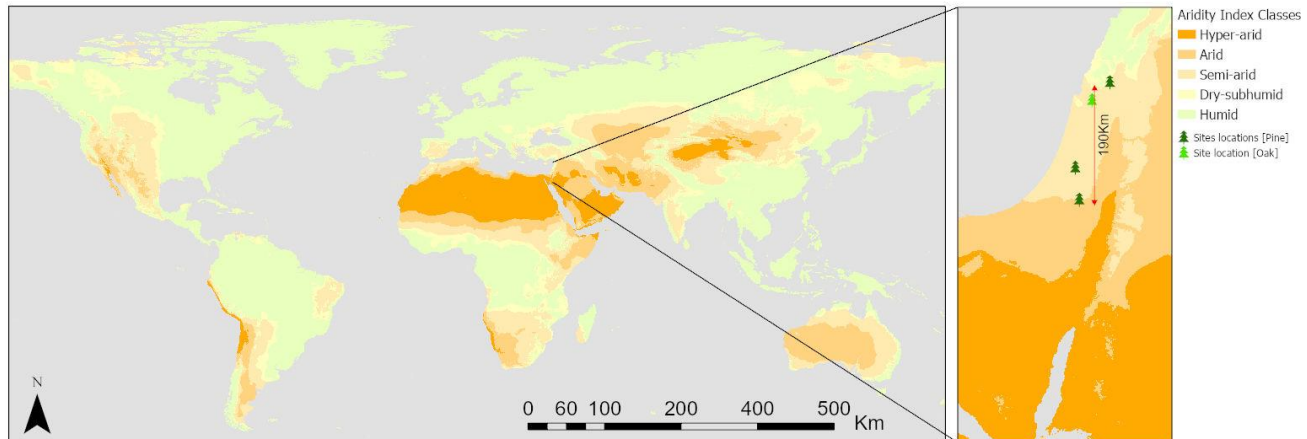

800

**Fig. 1. Global aridity index map and location of study sites across the climatic**

801

**gradient in Israel.** The Aridity Index was calculated as the ratio between Mean

802

Annual Precipitation and Mean Annual Potential Evapotranspiration, according to

803

Trabucco & Zomer, (2019; Global AI v2). AI was then used to classify hyper-arid

804

( $AI < 0.05$ ), arid ( $0.05 < AI < 0.2$ ), semi-arid ( $0.2 < AI < 0.5$ ), dry-subhumid

805

( $0.5 < AI < 0.65$ ), and humid ( $AI > 0.65$ ) areas. The enlarged inset map shows the

806

climatic gradient in Israel, indicating the paired sites locations of forested (pine or

807

oak) and adjacent non-forested ecosystems. AI classes are presented with the color

808

palette from orange (hyper-arid) to green (humid).

809

810

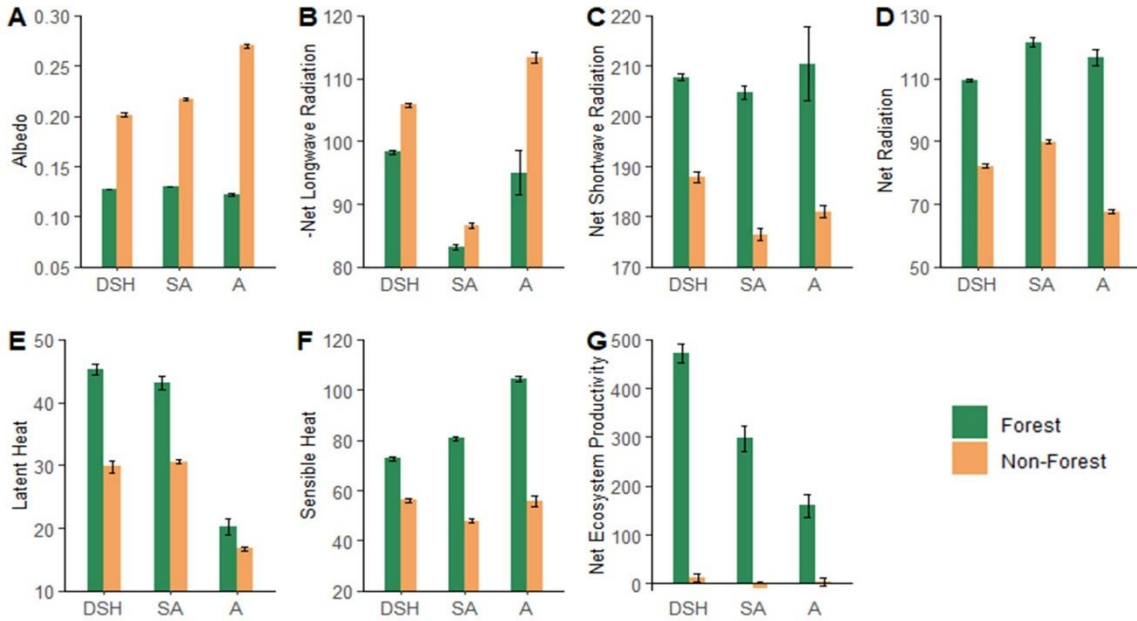

811

812

**Fig. 2. Forestation effects on the annual mean (2000–2015) values of the radiative**

813

**budget components and net ecosystem production.** Annual mean of Albedo (A),

814

Net Shortwave Radiation (SWnet in  $W m^{-2}$ ; B), -Net Longwave Radiation

815

(-LWnet in  $W m^{-2}$ ; C), Net Radiation (Rn in  $W m^{-2}$ ; D), Latent heat flux (LE in

816

$W m^{-2}$ ; E), Sensible heat flux (H in  $W m^{-2}$ ; F), and an annual sum of Net

817

Ecosystem Productivity (NEP in  $gC m^{-2} yr^{-1}$ ; G). Values are from the forest (green

818

bars) and non-forest (orange bars) ecosystems, across a climatic gradient, with dry-

819

subhumid (DSH) to semi-arid (SA) and arid (A) climatic conditions. Note, the

820

scaling differences among the sub-figures. The paired t-test was used to compare

821

multi-annual averages of all variables between forested and adjacent non-forested

822

sites and between sites across the climatic gradient. The error bars are for  $\pm$

823

standard errors of the means.

824

825

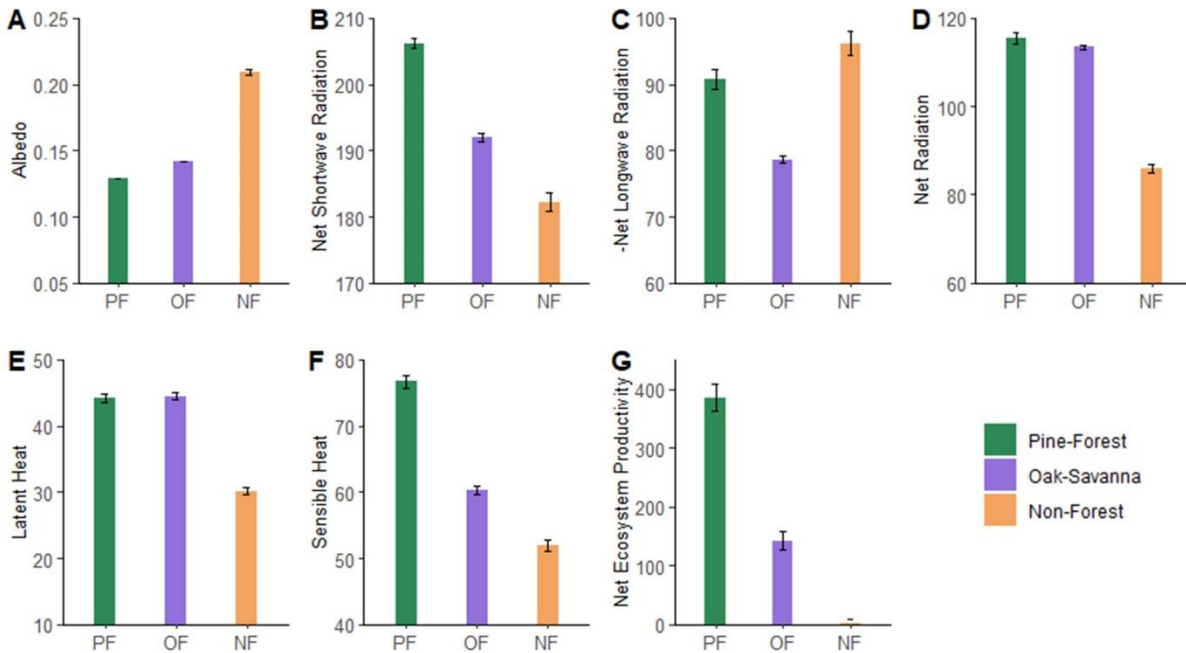

826

827

828

**Fig. 3. Land cover type effects on the annual means (2000–2015) of radiative and**

829

**non-radiative fluxes.** Annual mean of Albedo (**A**), Net Shortwave Radiation

830

( $SW_{net}$  in  $W m^{-2}$ ; **B**), -Net Longwave Radiation ( $-LW_{net}$  in  $W m^{-2}$ ; **C**), Net

831

Radiation ( $R_n$  in  $W m^{-2}$ ; **D**), Latent heat flux ( $LE$  in  $W m^{-2}$ ; **E**), Sensible heat flux

832

( $H$  in  $W m^{-2}$ ; **F**), and an annual sum of Net Ecosystem Productivity (NEP in  $gC$

833

$m^{-2} yr^{-1}$ ; **G**). Oak-forest (OF, purple bars) values compared with Aleppo Pine-

834

forest (PF, green bars) and non-forest (NF, orange bars) averaged from multi-year

835

annual means of the semi-arid and dry-subhumid paired sites. The paired t-test was

836

used to compare multi-annual averages of all variables between forested and

837

adjacent non-forested sites and between sites across the climatic gradient. The

838

error bars are for  $\pm$  standard errors of the means.

839

840

841

**Table 1. Differences between forested (F) and adjacent non-forested (NF) for the**

842

**three pine sites and one oak site in radiation budget and carbon stock. aridity**

843

index (AI), annual sums of precipitation (P, mm yr<sup>-1</sup>), annual means of global

844

radiation (R<sub>g</sub> in W m<sup>-2</sup>), annual minimum and annual maximum air temperature

845

(T<sub>a</sub> min-max in °C), annual means of changes (Δ=F–NF) in shortwave and

846

longwave net radiation (ΔSW<sub>net</sub> and ΔLW<sub>net</sub> in W m<sup>-2</sup>), and changes in average

847

annual sum (15 y) of net ecosystem productivity (NEP in gC m<sup>-2</sup> yr<sup>-1</sup>). The last

848

three columns present the years needed to balance between the warming effect due

849

to SW and LW forcing by the cooling effect of carbon stock change (‘Break even

850

time’ in years) according to Eq. 7.

851

|                     | AI<br>(#) | P<br>(mm<br>yr <sup>-1</sup> ) | R <sub>g</sub><br>(W m <sup>-2</sup> ) | T <sub>a</sub><br>min-max<br>(C°) | ΔSW <sub>net</sub><br>(W m <sup>-2</sup> ) | ΔLW <sub>net</sub><br>(W m <sup>-2</sup> ) | ΔNEP<br>(gC m <sup>-2</sup><br>yr <sup>-1</sup> ) | ‘Break even time’        |                          |                  |
|---------------------|-----------|--------------------------------|----------------------------------------|-----------------------------------|--------------------------------------------|--------------------------------------------|---------------------------------------------------|--------------------------|--------------------------|------------------|
|                     |           |                                |                                        |                                   |                                            |                                            |                                                   | SW<br>forcing<br>(years) | LW<br>forcing<br>(years) | Total<br>(years) |
| <b>Dry-Subhumid</b> | 0.64      | 770                            | 235                                    | 5–27                              | 19.8                                       | 7.5                                        | 460                                               | 31                       | 12                       | 43               |
| <b>Semi-arid</b>    | 0.37      | 480                            | 228                                    | 11–30                             | 28.2                                       | 3.4                                        | 310                                               | 65                       | 8                        | 73               |
| <b>Arid</b>         | 0.18      | 280                            | 242                                    | 6–28                              | 29.4                                       | 18.3                                       | 160                                               | 132                      | 81                       | 213              |
| <b>Oak-forest</b>   | 0.4       | 580                            | 223                                    | 9–29                              | 9.8                                        | 17.6                                       | 142                                               | 42                       | 89                       | 131              |

852

**Table 2. Comparison of global and large-scale regional studies with the current local study for the land cover changes effects on the surface radiative forcing.** net sequestration potential ( $\Delta SP$ , Eq. 9), emission equivalent of shortwave forcing (EESF, Eq. 10), and net equivalent stock change (NESC= SP–EESF, Eq. 11) are summarized based on published values from three large scale regional studies across three biomes (Boreal, Temperate, and Tropical). All values are in tC ha<sup>-1</sup> accumulated over forest age or rotation period as specified in the second column brackets. The last two rows represent the current study extrapolated over 80 years since forest establishment for arid and semi-arid dry-subhumid forests. When the longwave radiation forcing was included in the analysis, +EELF is indicated for the combined effect of shortwave and longwave radiation forcing or [EELF] if the longwave is calculated separately.

| Reference                                   | Land cover change             | Boreal          |                  |                 | Temperate       |                 |                  | Tropical     |             |              |
|---------------------------------------------|-------------------------------|-----------------|------------------|-----------------|-----------------|-----------------|------------------|--------------|-------------|--------------|
|                                             |                               | $\Delta SP$     | EESF             | NESC [Total]    | $\Delta SP$     | EESF            | NESC [Total]     | $\Delta SP$  | EESF        | NESC [Total] |
| <b>Betts</b> <sup>1</sup>                   | Crop to Conifer (40–80 years) | 118<br>(60–190) | 83<br>(60–100)   | 35<br>(–35–110) | 179<br>(80–310) | 49<br>(30–70)   | 130<br>(–30–110) |              |             |              |
| <b>Mykleby <i>et al.</i></b> <sup>13</sup>  | Grass to Conifer (80 years)   | 113<br>(96–155) | 116<br>(106–125) | –3<br>(–21–30)  | 190<br>(92–270) | 118<br>(90–144) | 72<br>(–12–140)  |              |             |              |
| <b>Favero <i>et al.</i></b> <sup>14</sup>   | Crop to mature forest         | 76              | 129              | –53             | 192             | 161             | 31               | 150          | 59          | 91           |
|                                             |                               | $\Delta SP$     | EESF+EELF        | NESC            | $\Delta SP$     | EESF+EELF       | NESC             | $\Delta SP$  | EESF+EELF   | NESC         |
| <b>Arora &amp; Montenegro</b> <sup>15</sup> | Crop to forest (90 years)     | 115             | 23*              | 92              | 106             | 28*             | 78               | 185          | –144*       | 329          |
|                                             |                               | Arid            |                  |                 | Semi-arid       |                 |                  | Dry-subhumid |             |              |
|                                             |                               | $\Delta SP$     | EESF [EELF]      | NESC [Total]    | $\Delta SP$     | EESF [EELF]     | NESC [Total]     | $\Delta SP$  | EESF [EELF] | NESC [Total] |
| <b>Current study</b>                        | Grass to Conifer (80 years)   | 120             | 211 [131]        | –91 [–222]      | 222             | 202 [24]        | –20 [–4]         | 353          | 142 [54]    | 211 [157]    |

\* Values indicated by Arora & Montenegro<sup>15</sup> included unit conversion (see Methods section)
